# Supplementary material for: Defining the root cause of reduced H1N1 live attenuated influenza vaccine effectiveness: low viral fitness leads to inter-strain competition
Source: PubMed Central journal article supplement (PMC7955111; doi:10.1038/s41541-021-00300-z), 2021-03-12
Supplement: 41541_2021_300_MOESM1_ESM.pdf [file 41541_2021_300_MOESM1_ESM.pdf]

## **LIST OF SUPPLEMENTARY MATERIALS**

Supplementary Table 1. Influenza strains aligned for design of quantitative reverse transcription polymerase chain reaction primers and probes to subtype-specific conserved regions.

Supplementary Table 2. Primers and probes for RT-qPCR analysis.

Supplementary Fig. 1. Assessment of non-infectious particle shedding by H1N1 strains.

Supplementary Fig. 2. H1N1 LAIV shedding kinetics in individual animals.

Supplementary Fig. 3. H3N2 LAIV shedding kinetics in individual animals.

Supplementary Fig. 4. B LAIV shedding kinetics in individual animals.

Supplementary Fig. 5. Serum MN responses to vaccination.

Supplementary Fig. 6. A/BOL13 provides reduced protection against wt challenge virus replication in respiratory tissues.

Supplementary Fig. 7. Quantitative analysis of ferret fever development.

## SUPPLEMENTARY MATERIALS

**Supplementary Table 1. Influenza strains aligned for design of quantitative reverse transcription polymerase chain reaction primers and probes to subtype-specific conserved regions**

| Year of Isolation | Strain                     | Subtype |
|-------------------|----------------------------|---------|
| 2009              | A/California/07/2009       | H1N1    |
|                   | A/Perth/16/2009            | H3N2    |
|                   | A/Victoria/210/2009        | H3N2    |
|                   | A/Hong Kong/26560/2009     | H3N2    |
| 2010              | A/Brisbane/10/2010         | H1N1    |
|                   | A/Perth/10/2010            | H3N2    |
|                   | A/Iowa/19/2010             | H3N2    |
|                   | B/Wisconsin/01/2010        | B-Yam   |
| 2011              | A/Christchurch/28/2011     | H3N2    |
|                   | A/Victoria/361/2011        | H3N2    |
|                   | A/Berlin/93/2011           | H3N2    |
|                   | B/Nevada/03/2011           | B-Vic   |
|                   | B/Texas/06/2011            | B-Yam   |
| 2012              | A/Hawaii/22/2012           | H3N2    |
|                   | A/Texas/50/2012            | H3N2    |
|                   | A/Ohio/2/2012              | H3N2    |
|                   | A/New York/39/2012         | H3N2    |
|                   | B/Massachusetts/02/2012    | B-Yam   |
|                   | A/Washington/24/2012       | H1N1    |
| 2013              | A/Dominican Rep/7293/2013  | H1N1    |
|                   | A/Bolivia/559/2013         | H1N1    |
|                   | A/New Hampshire/04/2013    | H1N1    |
|                   | A/South Africa/3626/2013   | H1N1    |
|                   | A/American Samoa/4786/2013 | H3N2    |

|      |                            |       |
|------|----------------------------|-------|
|      | A/Costa Rica/4700/2013     | H3N2  |
|      | A/Switzerland/9715293/2013 | H3N2  |
|      | B/Texas/2/2013             | B-Vic |
|      | B/Phuket/3073/2013         | B-Yam |
| 2014 | A/Palau/6759/2014          | H3N2  |
|      | A/Hong Kong/4801/2014      | H3N2  |
|      | A/New Caledonia/71/2014    | H3N2  |
|      | A/Laos/1187/2014           | H1N1  |
|      | A/New Caledonia/58/2014    | H1N1  |
|      | A/Tasmania/24/2014         | H1N1  |
|      | B/Hawaii/24/2014           | B-Vic |
| 2015 | A/South Australia/9/2015   | H3N2  |
|      | A/Alaska/232/2015          | H3N2  |
|      | A/Michigan/45/2015         | H1N1  |
|      | A/St Petersburg/61/2015    | H1N1  |
|      | A/Lisboa/32/2015           | H1N1  |
|      | A/Singapore/GP1908/2015    | H1N1  |
|      | A/Shanghai-Putuo/1860/2015 | H1N1  |
|      | A/Slovenia/2903/2015       | H1N1  |
|      | B/Indiana/25/2015          | B-Vic |
|      | B/Florida/78/2015          | B-Vic |
|      | B/Maryland/12/2015         | B-Yam |
|      | B/California/12/2015       | B-Yam |
|      | B/Arizona/10/2015          | B-Yam |
| 2016 | A/Idaho/33/2016            | H3N2  |

---

**Supplementary Table 2. Primers and probes for RT-qPCR analysis**

| Purpose                      | Gene Target | Subtype                  | Seq 5'-3'                                                         | Manufacturer |
|------------------------------|-------------|--------------------------|-------------------------------------------------------------------|--------------|
| Reference standard synthesis | NA          | H1N1 & H3N2              | <b>TAATACGACTCACTATAGGG</b> AGTAGAAACAAGGAGTTTTT <sup>1</sup>     | IDT          |
|                              |             | B Yamagata               | <b>TAATACGACTCACTATAGGG</b> AGTAGTAACAAGAGCATTTCAG*               | IDT          |
|                              |             | B Victoria               | <b>TAATACGACTCACTATAGGG</b> TAGTAGTAACAAGAGCATTTC <sup>1</sup>    | IDT          |
| RT-qPCR                      | NA          | <u>H1N1 Pre-Pandemic</u> | <u>TACTAAATCAATAGAGTTGAATGCACC</u>                                | IDT          |
|                              |             |                          | <u>ACTGGATTACAGCTGCCCTCTCC</u>                                    | IDT          |
|                              |             |                          | <u>FAM-TCAAATAGGATACATCTGCAGTGGG-MGBNFQ</u>                       | ThermoFisher |
|                              |             | H1N1 Post-Pandemic       | AGTCAAATCAGTCGAAATGAAAGCC                                         | IDT          |
|                              |             |                          | TACTGGACCACAACCTGCCTGTCT                                          | IDT          |
|                              |             |                          | <u>FAM-TCAGATGGGATACATATGCAGTGGG-MGBNFQ</u>                       | ThermoFisher |
|                              |             | H3N2                     | CGTTCATACTAGCACATTGTCAGGA                                         | IDT          |
|                              |             |                          | CCAAACAATGGCTACTGCTGGAGC                                          | IDT          |
|                              |             |                          | <u>VIC-TGTTTCCAGTTATGTGTGTTTCAGGA-MGBNFQ</u>                      | ThermoFisher |
|                              |             | B Yamagata               | CAAGATTGGAAGGTGGTACTCTCG                                          | IDT          |
|                              |             |                          | TCTATCCAATACAGGGGACATC                                            | IDT          |
|                              |             |                          | <u>ROX-ACTGACAGTGAAGCCCTTGTCT-lowa black 3IAbRQSp<sup>2</sup></u> | IDT          |
|                              |             | B Victoria               | GGAGGTCAATGTGACTGGTGT                                             | IDT          |
|                              |             |                          | TTTTGTTCTGTCGTGCATTATAGG                                          | IDT          |
|                              |             |                          | <u>NED-TGGGCAGACCAAAATGCAC-MGBNFQ</u>                             | ThermoFisher |
| Sample normalization         | GAPDH       | Not applicable           | <u>TGCGGCCAAGGCAGTAG</u>                                          | IDT          |
|                              |             |                          | <u>AGGCCATGCCAGTGAGCTT</u>                                        | IDT          |
|                              |             |                          | <u>VIC-CTGAGCTGAATGGGAAG-MGBNFQ</u>                               | IDT          |

Primer and probe sequences outside the date ranges of 2009–2016, as described in Materials and Methods: RNA extraction and multiplex RT-qPCR, are underlined for each RT-qPCR primer/probe set. <sup>1</sup>T7 sequence highlighted in bold text, <sup>2</sup>Super T bases highlighted in bold text.

GAPDH, glyceraldehyde-3-phosphate dehydrogenase; HA, hemagglutinin; IDT, Integrated Device Technology, Inc.; NA, neuraminidase; RT-qPCR, quantitative reverse transcription polymerase chain reaction.

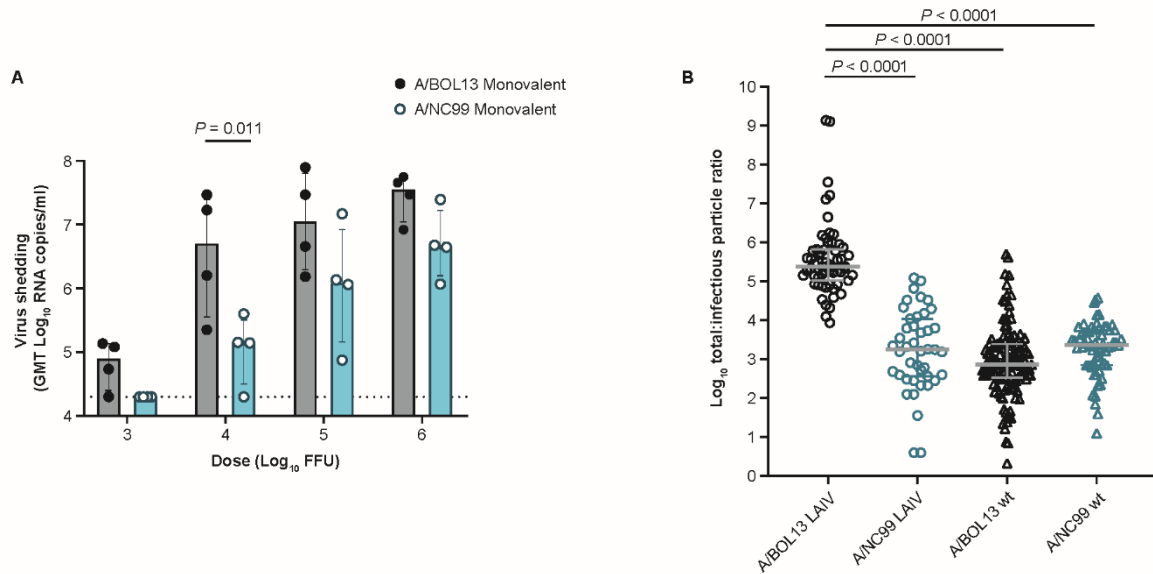

### Supplementary Fig. 1. Assessment of non-infectious particle shedding by

**H1N1 strains. a** A/BO13 versus A/NC99 monovalent LAIV geometric mean Days 1–

5 shedding measured by RT-qPCR. Columns and error bars show median and

interquartile range of four animal groups. **b** Ratio of monovalent LAIV and wt total

virus (RT-qPCR copy number) to infectious virus (TCID<sub>50</sub>) shedding. Symbols

represent individual nasal swab samples from Days 1–5 post-monovalent LAIV

vaccination or Days 1–3 post-wt challenge. Dotted lines indicate lower limit of

detection; values below this were plotted as 0.5x the lower limit of detection.

A/BOL13, A/Bolivia/559/2013; A/NC99, A/New Caledonia/20/1999; FFU, fluorescent

focus units; GMT, geometric mean titer; LAIV, live attenuated influenza vaccine; RT-

qPCR, quantitative reverse transcription polymerase chain reaction; TCID<sub>50</sub>, tissue

culture infectious dose 50%; wt, wild-type.

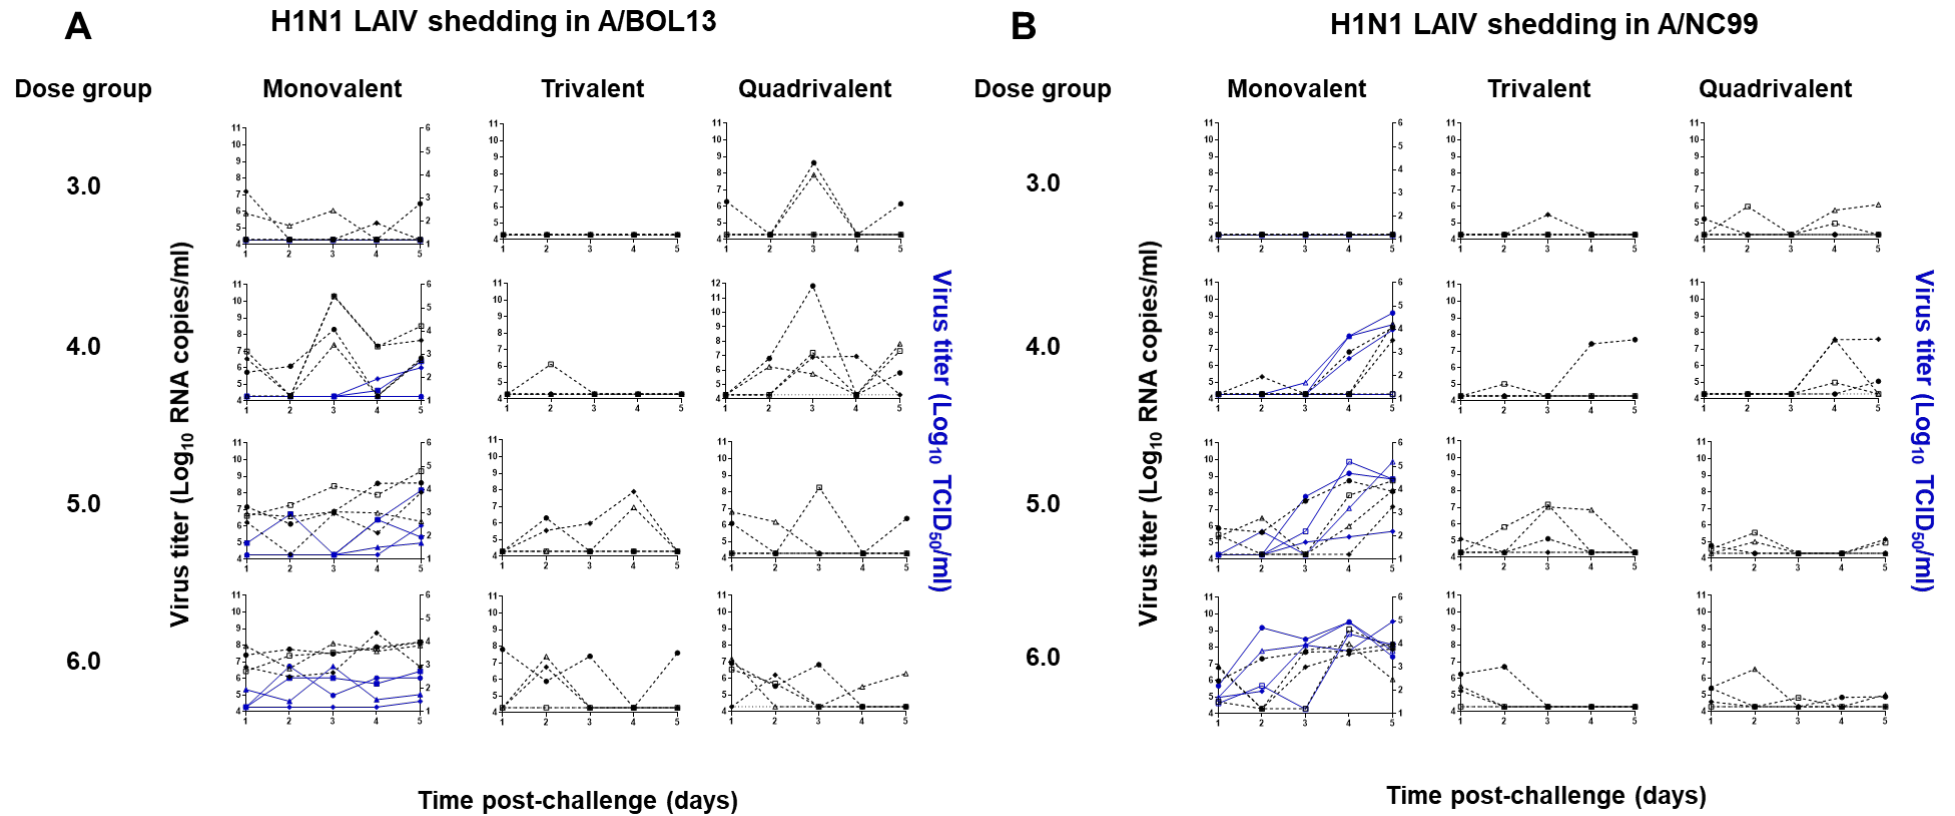

**Supplementary Fig. 2. H1N1 LAIV shedding kinetics in individual animals.** Days 1–5 post-vaccination, measured by RT-qPCR (left y-axis, dashed black lines) and TCID<sub>50</sub> (monovalent LAIV animals only, right y-axis, blue lines). Graphs show values from individual animals (symbols). **a** A/BOL13 LAIV shedding in monovalent, trivalent, quadrivalent (right column). **b** A/NC99 LAIV

shedding in monovalent, trivalent, and quadrivalent. Dose groups are aligned vertically, from 3.0–6.0 log<sub>10</sub> FFU.

A/BOL13, A/Bolivia/559/2013; A/NC99, A/New Caledonia/20/1999; FFU, fluorescent focus units; LAIV, live attenuated influenza vaccine; RT-qPCR, quantitative reverse transcription polymerase chain reaction; TCID<sub>50</sub>, tissue culture infectious dose 50%.

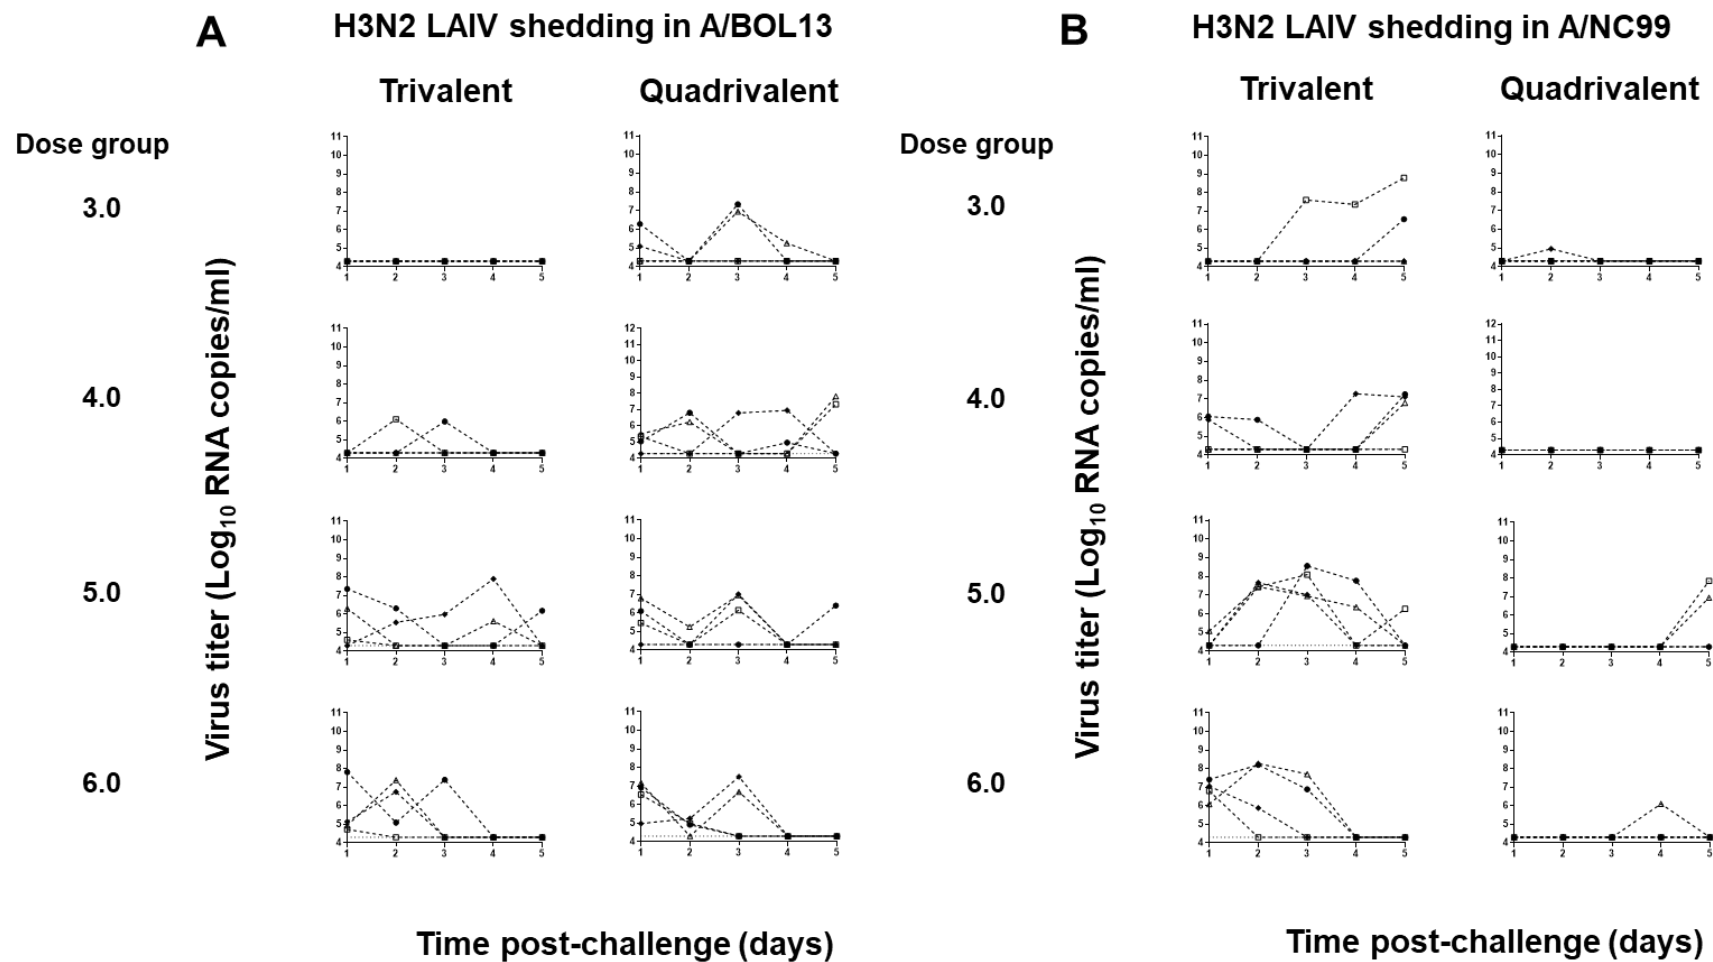

**Supplementary Fig. 3. H3N2 LAIV shedding kinetics in individual animals.** Days 1–5 post-vaccination, measured by RT-qPCR.

Graphs show values from individual animals (symbols). **a–b.** A/SWITZ13 shedding in either A/BOL13 (**a**) or A/NC99 (**b**) trivalent



and quadrivalent LAIV. Dose groups are aligned vertically, from 3.0–6.0 log<sub>10</sub> FFU.

A/BOL13, A/Bolivia/559/2013; A/NC99, A/New Caledonia/20/1999; FFU, fluorescent focus units; LAIV, live attenuated influenza vaccine; RT-qPCR, quantitative reverse transcription polymerase chain reaction; TCID<sub>50</sub>, tissue culture infectious dose 50%.

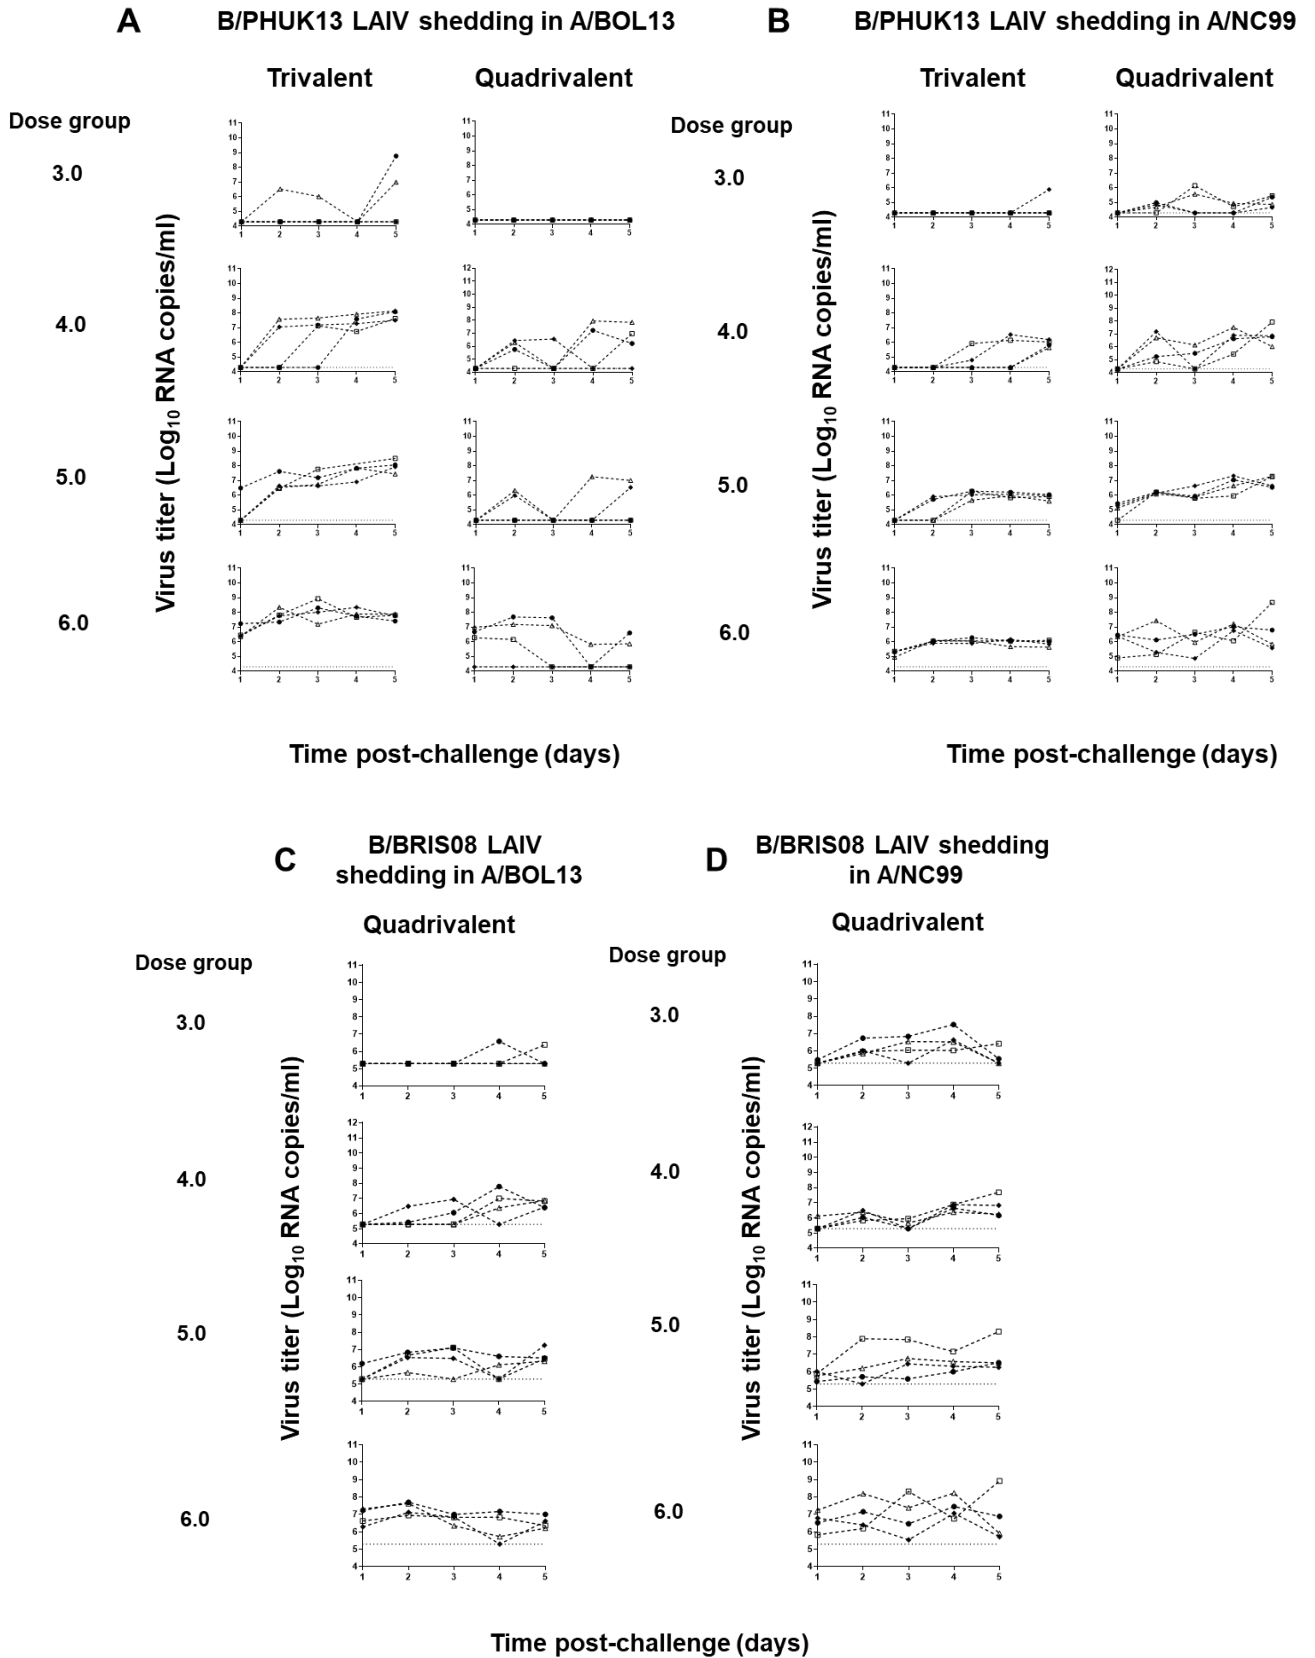

**Supplementary Fig. 4. B LAIV shedding kinetics in individual animals. Days 1–5** post-vaccination, measured by RT-qPCR. Graphs show values from individual

animals (symbols). **a–b.** B/PHUK13 LAIV shedding in A/BOL13 (**a**) or A/NC99 (**b**) trivalent and quadrivalent LAIV. **c–d.** B/BRIS08 LAIV shedding in A/BOL13 (**c**) or A/NC99 (**d**) quadrivalent. Dose groups are aligned vertically, from 3.0–6.0 log<sub>10</sub> FFU. A/BOL13, A/Bolivia/559/2013; A/NC99, A/New Caledonia/20/1999; B/PHUK13, B/BRIS08, B/Brisbane/60/2008; B/Phuket/3073/2013; FFU, fluorescent focus units; LAIV, live attenuated influenza vaccine; RT-qPCR, quantitative reverse transcription polymerase chain reaction; TCID<sub>50</sub>, tissue culture infectious dose 50%.

A

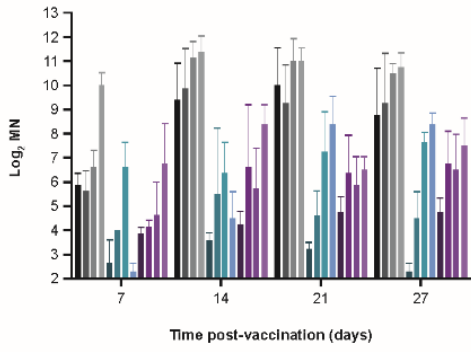

B

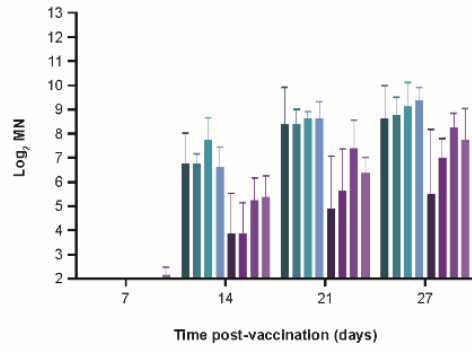

C

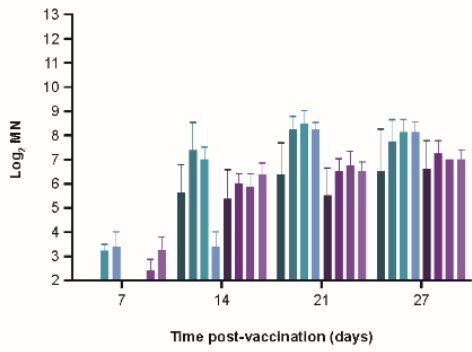

D

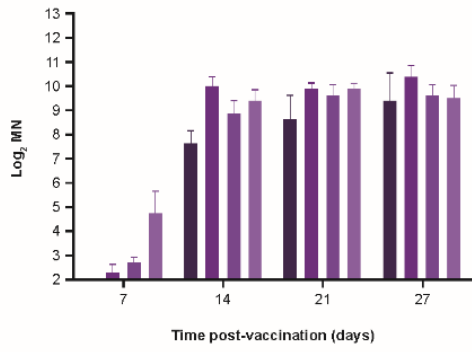

E

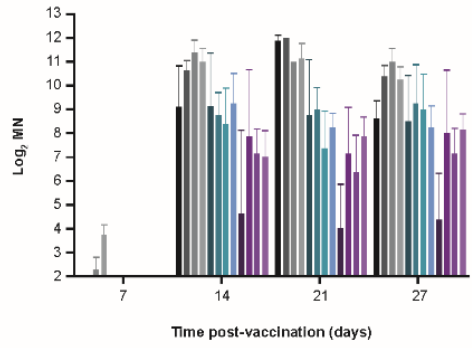

F

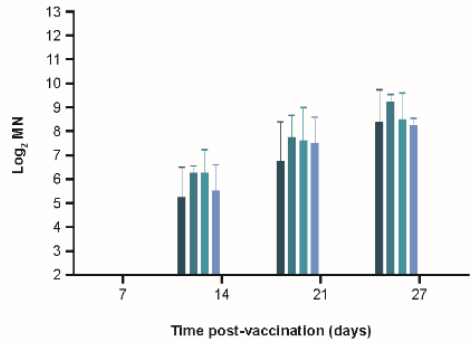

G

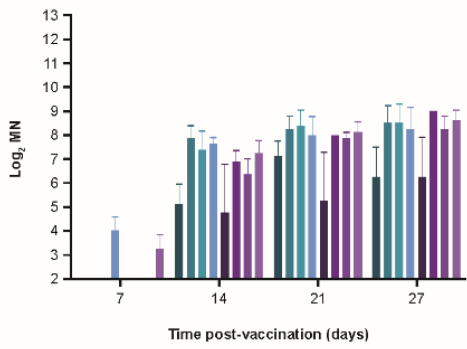

H

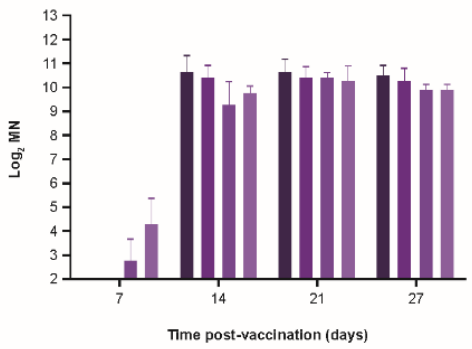

**Supplementary Fig. 5. Serum MN responses to vaccination.** MN responses were measured on Days 7, 14, 21, and 27 post-vaccination. **a–d.** A/BOL13 formulations: **a** A/BOL13; **b** A/SWITZ13; **c** B/PHUK13; **d** B/BRIS08. **e–h** A/NC99 formulations: **e** A/NC99; **f** A/SWITZ13; **g** B/PHUK13; **h** B/BRIS08. Columns and error bars show geometric mean and geometric standard deviation. Grey bars: monovalent LAIV 3.0–6.0 log<sub>10</sub> doses (M3–M6), blue bars: trivalent LAIV 3.0–6.0 log<sub>10</sub> doses (T3–T6) and purple quadrivalent LAIV 3.0–6.0 log<sub>10</sub> doses (Q3–Q6). A/BOL13, A/Bolivia/559/2013; A/NC99, A/New Caledonia/20/1999; A/SWITZ13, A/Switzerland/9715293/2013; B/BRIS08, B/Brisbane/60/2008; B/PHUK13, B/Phuket/3073/2013; LAIV, live attenuated influenza vaccine; MN, microneutralization.

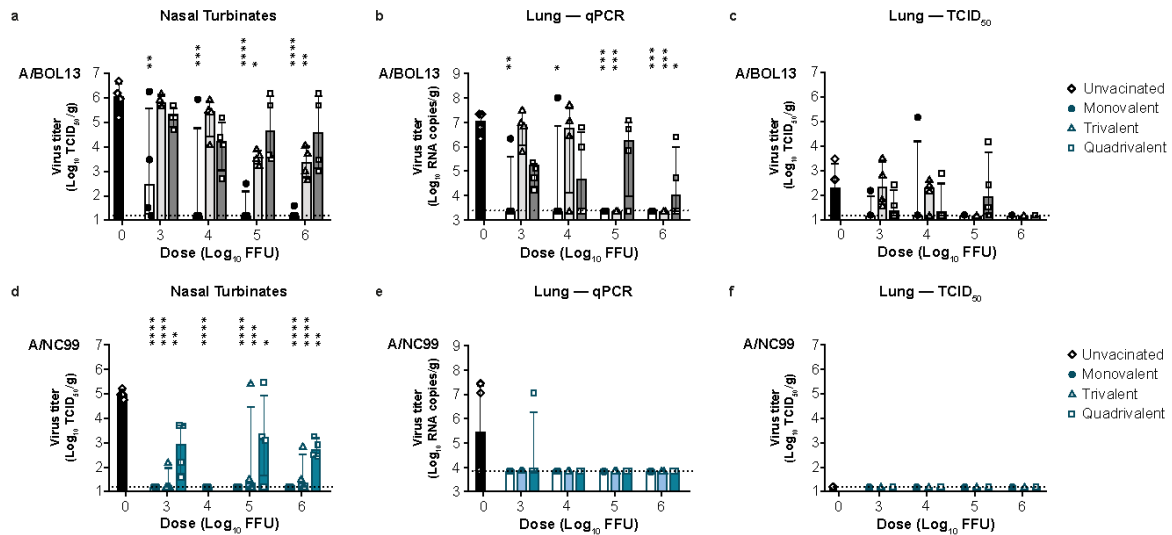

**Supplementary Fig. 6. A/BOL13 provides reduced protection against wt challenge virus replication in respiratory tissues.** Levels of wt challenge virus replication at Day 3 post-challenge in lung and NT tissues. **a, d.** wt virus titers in NT by TCID<sub>50</sub>. **b, e.** wt virus titers in lungs by RT-qPCR. **c, f.** wt virus titers in lungs by TCID<sub>50</sub>. Data shown are geometric mean virus titers for individual animals (symbols), with 4 animals per dose group. Columns and error bars for all virus titer data show group median and interquartile range. Statistical comparison between groups was performed by two-way analysis of variance with Sidak's post-test correcting for multiple comparisons. \* $P < 0.05$ , \*\* $P < 0.01$ , \*\*\* $P < 0.001$ , \*\*\*\* $P < 0.0001$ . Dotted lines indicate lower limit of detection; values below this were plotted as 0.5x the lower limit of detection.

A/BOL13, A/Bolivia/559/2013; A/NC99, A/New Caledonia/20/1999; FFU, fluorescent focus units; GMT, geometric mean titer; NT, nasal turbinate; RT-qPCR, quantitative reverse transcription polymerase chain reaction; TCID<sub>50</sub>, tissue culture infectious dose 50%; wt, wild-type.

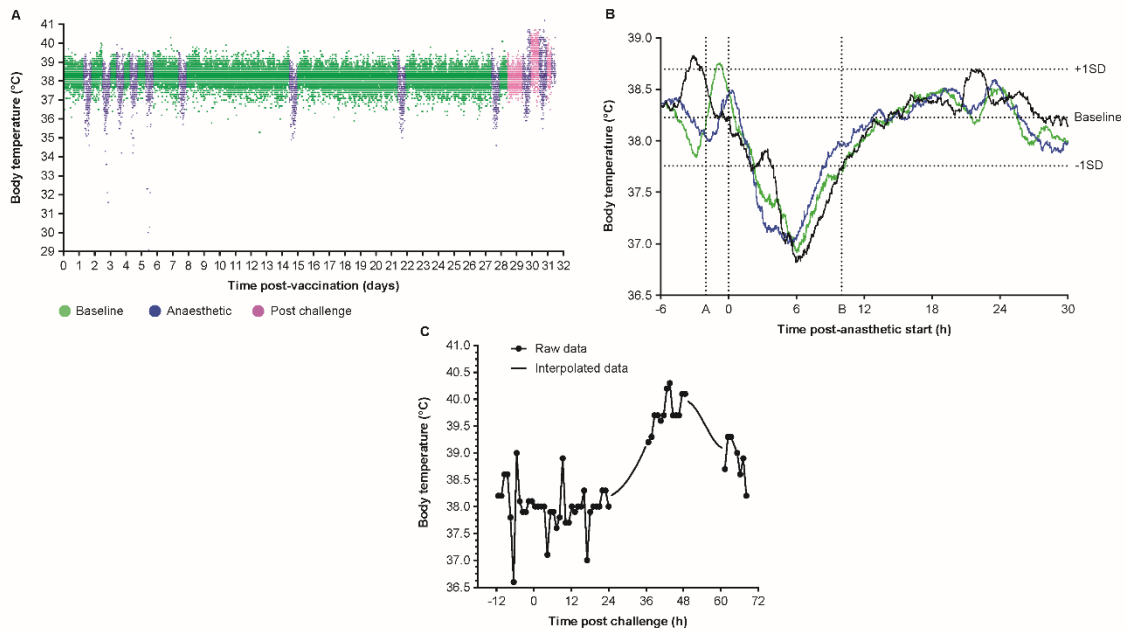

### Supplementary Fig. 7. Quantitative analysis of ferret fever development.

Intraperitoneal telemetry monitors were used to measure ferret core temperature 1 hourly for study duration. **a** Example of complete raw temperature data set for wt A/BOL13 challenge (52 animals). Green: normal body temperature. Blue: anesthetic hypothermia. Pink: post-challenge period. **b** Example of removal (A to B) of anesthetic hypothermia artefact, with three representative temperature traces shown (50-point moving average, all animals). **c** Example of quadratic spline interpolation of data to repair excluded hypothermia artefact in post-challenge temperature trace. A/BOL13, A/Bolivia/559/2013; h, hour; SD, standard deviation; wt, wild-type
